# Supplementary material for: Solvent Free Synthesis and Safener Activity of Sulfonylurea Benzothiazolines
Source: Preprints.org preprint supplement (doi:10.20944/preprints201709.0056.v1), 2017-09-14

2,2-dimethyl-N-[(4-methylphenyl)sulfonyl]-1,3-benzothiazoline-3(2H)-formamide (**3a**)

IR:

1H-NHR:

13C-NHR:


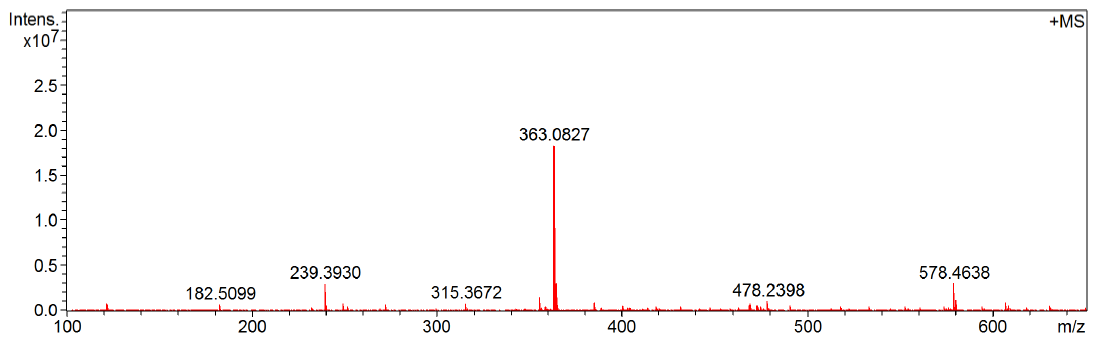


2-ethyl-2-methyl-N-[(4-methylphenyl)sulfonyl]-1,3-benzothiazoline-3(2H)-form amide (**3b**)

IR:

1H-NHR：

13C-NHR：


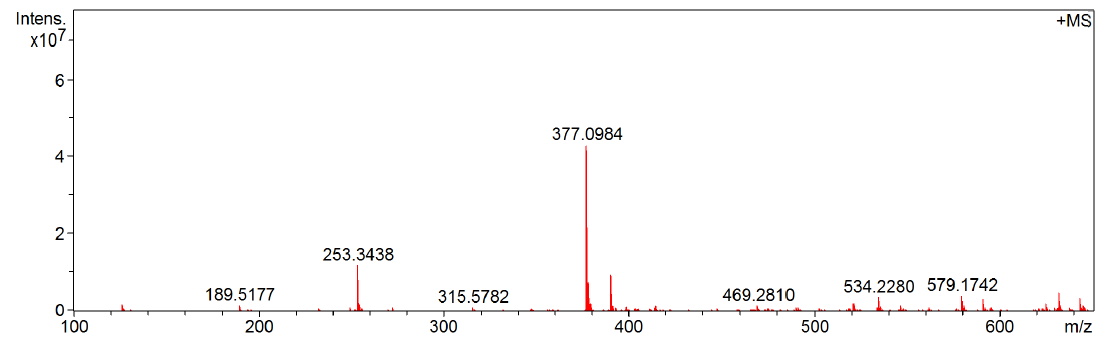


2-propyl-2-methyl-N-[(4-methylphenyl)sulfonyl]-1,3-benzothiazoline-3(2H)-formamide (**3c**)

IR:

1H-NHR：

13C-NHR：

HRMS:


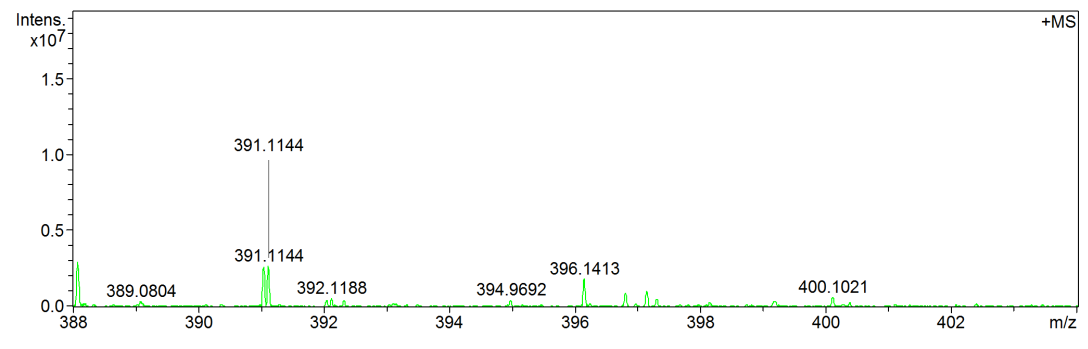


2-isopropyl-2-methyl-N-[(4-methylphenyl)sulfonyl]-1,3-benzothiazoline-3(2H)- formamide (**3d**)

IR:

1H-NHR：

13C-NHR：

HRMS:


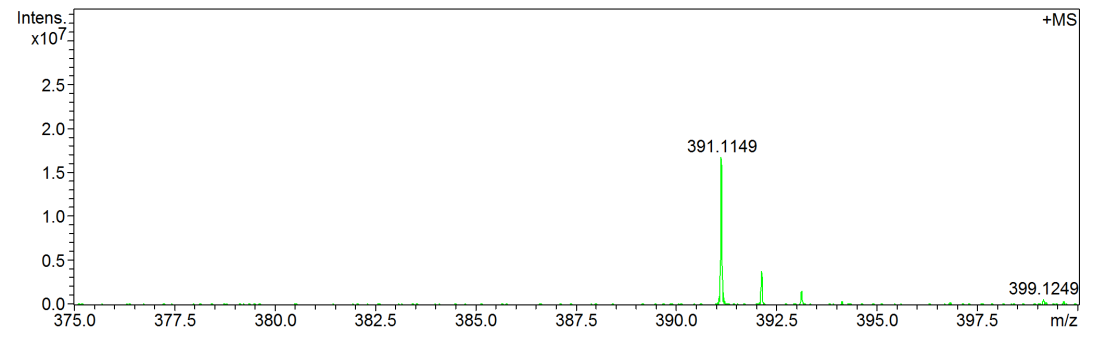


2-acetonyl-2-methyl-N-[(4-methylphenyl)sulfonyl]-1,3-benzothiazoline-3(2H)-for mamide (**3e**)

IR:

1H-NHR：

13C-NHR：

HRMS:


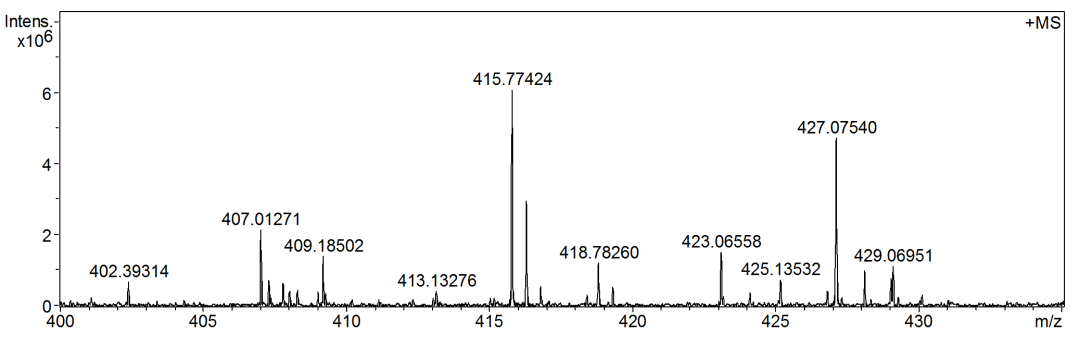


2-2-methyl-N-butyl-[(4-methylphenyl)sulfonyl]-1,3-benzothiazoline-3-(2H)-formamide (**3f**)

IR:

1H-NHR:

13C-NHR:

HRMS:


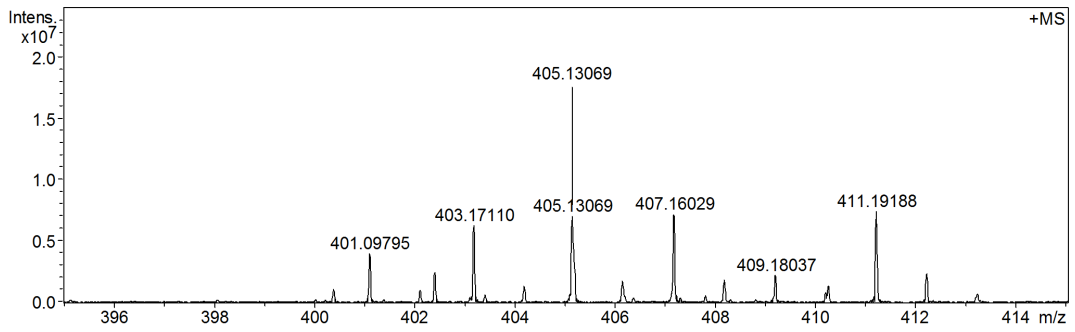


2-isobutyl-2-methyl-N-[(4-methylphenyl)sulfonyl]-1,3-benzothiazoline-3-(2H)- formamide (**3g**)

IR:

1H-NHR：

13C-NHR：


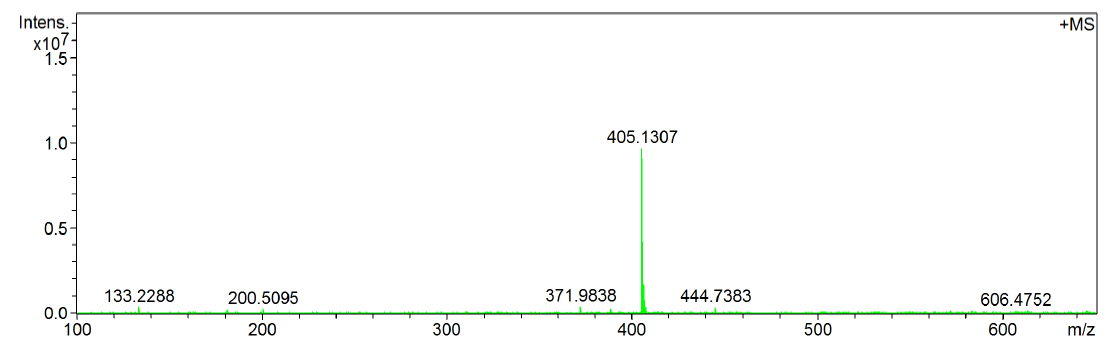


2-tert-butyl-2-methyl-N-[(4-methylphenyl)sulfonyl]-1,3benzothiazoline-3(2H)- formamide (**3h**)

IR

1H-NHR：

13C-NHR：

HRMS:


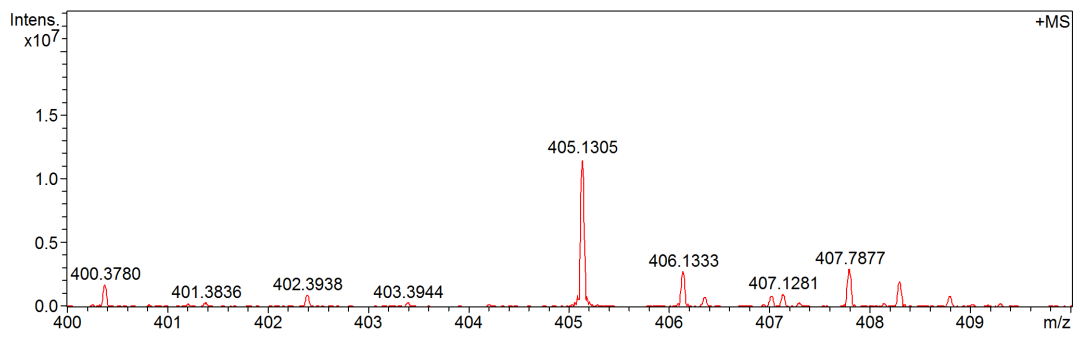


2-phenylethyl-2-methyl-N-[(4-methylphenyl)sulfonyl]-1,3–benzothiazoline-3(2 H)-formamide (**3i**)

IR:

1H-NHR：

13C-NHR：

HRMS:


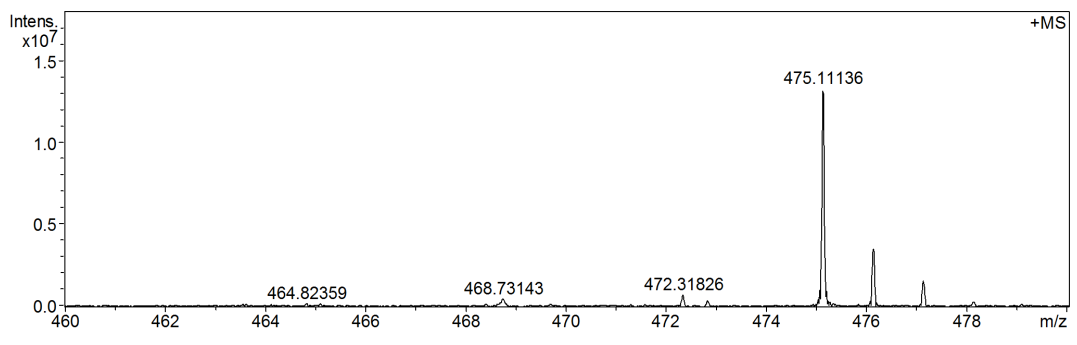


2,2,-diethyl-N-[(4-methylphenyl)sulfonyl]-1,3-benzothiazoline-3(2H)-formamide (**3j**)

IR:

1H-NHR:

13C-NHR：

HR-MS:


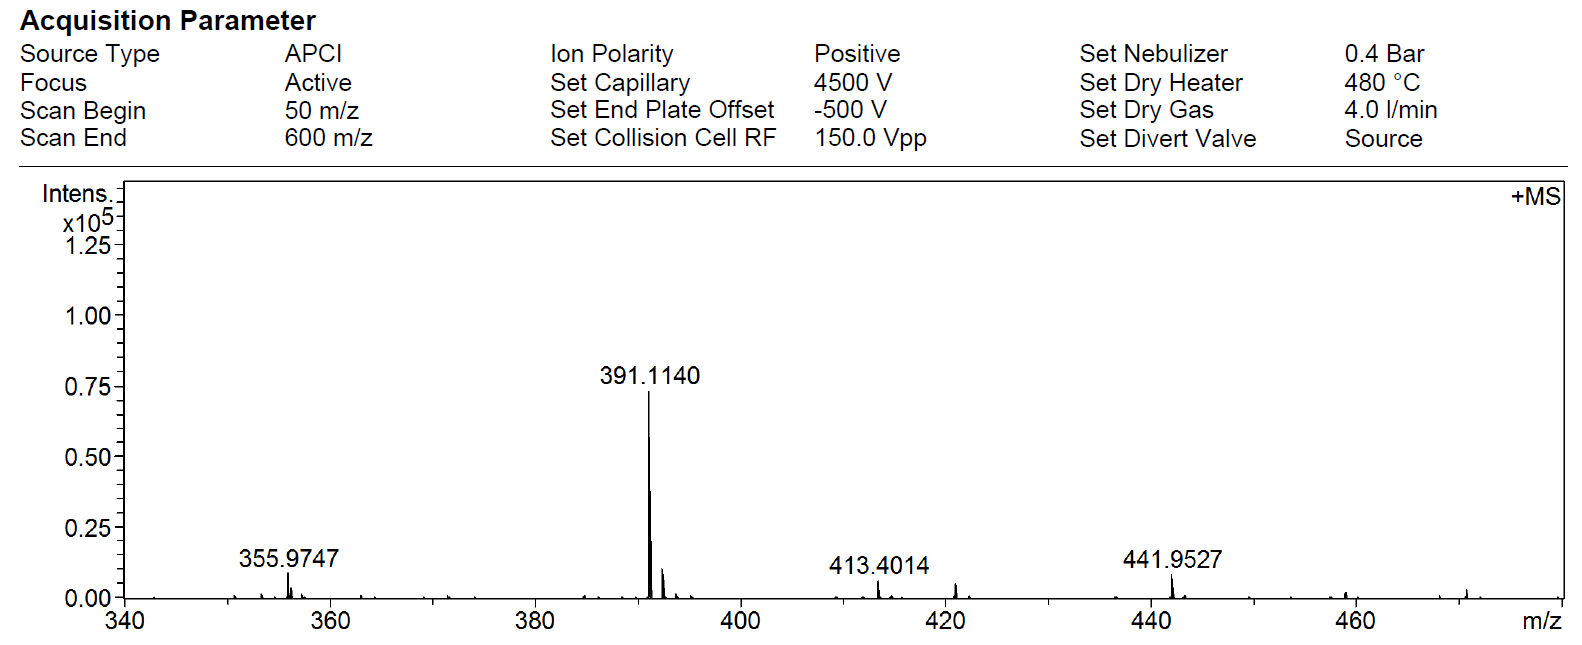


2,2,-dipropyl-N-[(4-methylphenyl)sulfonyl]-1,3-benzothiazoline-3(2H)–formamide (**3k**)

IR:

1H-NHR：

13C-NHR：

HRMS:


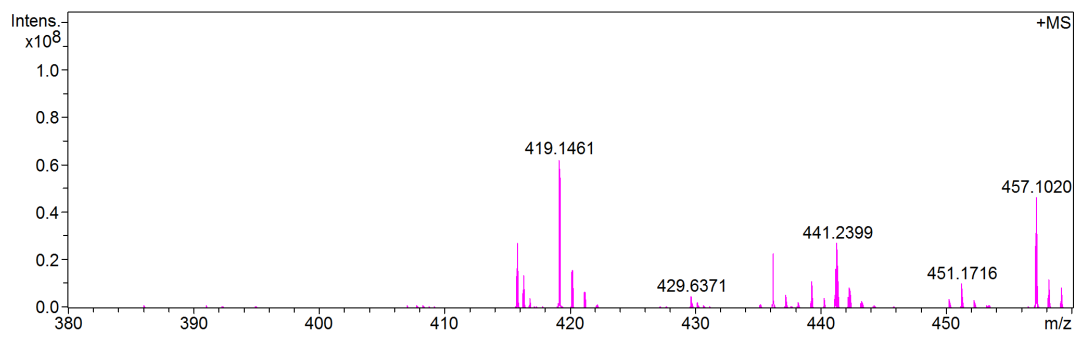


N-[(4-methylphenyl)sulfonyl]-3h-screw[1,3-benzothiazoline-2,1'-cyclopentane] -3-formamide (**3l**)

IR:

1H-NHR：

13C-NHR：

HRMS:


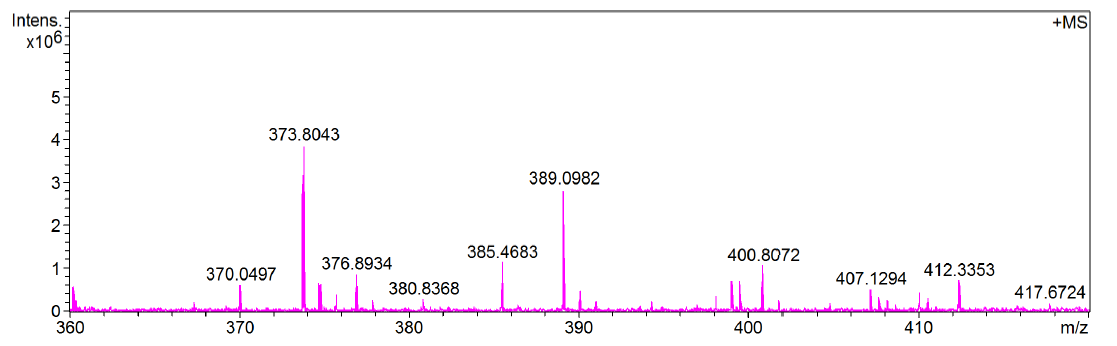


N-[(4-methyl-phenyl)sulfonyl]-3h-screw[1,3-benzothiazoline-2,1'-cyclohexane]-3-formamide (**3m**)

IR:

1H-NHR：

13C-NHR：

HRMS:


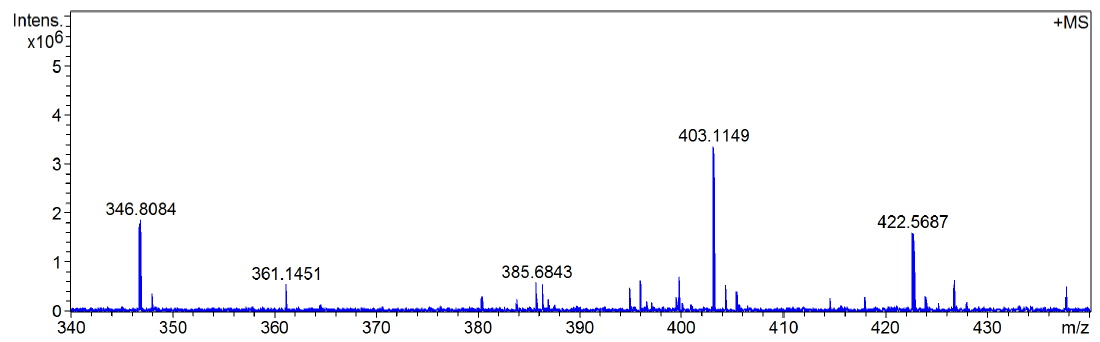

Supplement: Supplementary file 2 [file supplementary]
